# Supplementary material
Source: publisher figshare collection journal article supplement (https://gsapubs.figshare.com/ndownloader/files/23315354)
Supplement: Supplementary file 1 [file 23315354]

## Sheet: Table DR1
Table DR1. LA-ICP-MS results for zircons U-Pb ages of samples in this study
Analysis Spot	Pb (ppm)	U (ppm)	Th/U	Isotopic ratios						Apperent ages (Ma)
				206Pb/238U	1σ	207Pb/235U	1σ	207Pb/206Pb	1σ	206Pb/238U	1σ	207Pb/235U	1σ	207Pb/206Pb	1σ
D8524-1	80.15	246.01	0.3258	0.07637	0.00184	0.58947	0.01904	0.05599	0.00193	474.4	11	470.5	12.16	451.6	74.84
D8524-2	356.07	1088.57	0.327099	0.07672	0.00159	0.60892	0.01422	0.05757	0.00139	476.5	9.53	482.9	8.97	512.9	52.55
D8524-3	38.54	107.55	0.358345	0.07889	0.00178	0.59844	0.01709	0.05502	0.00166	489.5	10.62	476.2	10.85	413	65.39
D8524-4	60.13	183.8	0.327149	0.07662	0.00198	0.58013	0.02139	0.05492	0.00218	475.9	11.83	464.5	13.74	408.8	85.76
D8524-5	184.43	534.33	0.345161	0.07954	0.00162	0.6198	0.0139	0.05652	0.0013	493.4	9.69	489.7	8.71	472	50.77
D8524-6	186.1	549.8	0.338487	0.07733	0.00166	0.61556	0.01576	0.05773	0.00155	480.2	9.96	487.1	9.9	519.4	58.08
D8524-7	119.31	350.93	0.339982	0.07796	0.00162	0.6552	0.01532	0.06095	0.00148	483.9	9.68	511.7	9.4	637.5	51.42
D8524-8	205.31	572.82	0.35842	0.07872	0.00161	0.61215	0.01393	0.0564	0.00133	488.5	9.63	484.9	8.77	467.3	51.73
D8524-9	198.46	580.76	0.341725	0.0773	0.00156	0.59327	0.01308	0.05565	0.00126	480	9.35	473	8.34	438.3	49.35
D8524-10	155.13	455.14	0.34084	0.0774	0.00158	0.62084	0.01401	0.05817	0.00136	480.6	9.45	490.4	8.78	535.6	50.79
D8524-11	105.91	320.56	0.330391	0.0762	0.00168	0.64596	0.01737	0.06148	0.00175	473.4	10.07	506	10.71	655.9	59.87
D8524-12	176.87	526.31	0.336057	0.07637	0.00155	0.60581	0.01353	0.05752	0.00133	474.4	9.28	480.9	8.56	511.2	50.26
D8524-13	62.4	184.38	0.338432	0.07667	0.00164	0.58568	0.01516	0.05539	0.00151	476.2	9.83	468.1	9.71	427.6	59.14
D8524-14	137.72	406.48	0.338811	0.07704	0.0017	0.60762	0.01667	0.05719	0.00166	478.4	10.18	482.1	10.53	498.4	63.28
D8524-15	109.47	318.02	0.344224	0.07698	0.00158	0.64165	0.01486	0.06044	0.00146	478.1	9.47	503.3	9.19	619.3	51.19
D8524-16	66.23	195.34	0.33905	0.07675	0.00164	0.71634	0.01786	0.06767	0.00178	476.7	9.83	548.5	10.57	858.5	53.7
D8524-17	50.13	149.28	0.335812	0.07583	0.00168	0.5986	0.01659	0.05724	0.00168	471.2	10.04	476.3	10.54	500.2	63.9
D8524-18	281.7	850.24	0.331318	0.07567	0.00158	0.6016	0.01469	0.05764	0.00147	470.2	9.49	478.2	9.31	515.9	55.52
D8524-19	76.73	223.63	0.343111	0.07807	0.0016	0.62452	0.0145	0.058	0.0014	484.6	9.57	492.7	9.06	529.4	52.55
D8524-20	166.19	511.43	0.324952	0.07743	0.00168	0.61952	0.01645	0.05801	0.00163	480.7	10.05	489.5	10.32	529.9	60.79
D8524-21	92.87	267.8	0.346789	0.07746	0.00162	0.59939	0.01469	0.0561	0.00144	480.9	9.67	476.8	9.32	456.2	55.99
D8524-22	127.71	381.88	0.334424	0.07565	0.00155	0.60645	0.01423	0.05812	0.00143	470.1	9.32	481.3	8.99	533.8	53.3
D8524-23	172.74	527.9	0.327221	0.07507	0.00166	0.60219	0.01677	0.05815	0.00172	466.7	9.96	478.6	10.63	535.1	64.05
D8524-24	345.17	1010.84	0.341468	0.07679	0.00153	0.64175	0.01385	0.06059	0.00135	476.9	9.15	503.4	8.57	624.7	47.45
D8523-1	47.51	143.02	0.702349	0.07594	0.00173	0.58959	0.01786	0.05629	0.00182	471.8	10.38	470.6	11.41	462.9	70.35
D8523-2	64.19	194.6	0.770555	0.07735	0.00224	0.64576	0.02796	0.06052	0.00286	480.3	13.38	505.9	17.25	622.4	98.76
D8523-3	77.02	231.42	0.744361	0.0772	0.00171	0.61631	0.01725	0.05787	0.00173	479.4	10.22	487.5	10.84	524.7	64.33
D8523-4	72.36	212.74	0.92559	0.07726	0.0018	0.60459	0.01881	0.05673	0.00189	479.8	10.77	480.1	11.9	480.3	72.72
D8523-5	69.67	165.96	0.869667	0.07789	0.00188	1.49858	0.03994	0.13948	0.00415	483.5	11.24	929.8	16.23	2220.8	50.63
D8523-6	41.49	126.99	0.850697	0.0771	0.00197	0.6547	0.02334	0.06156	0.00238	478.8	11.76	511.4	14.32	658.7	80.8
D8523-7	35.94	100.94	0.867743	0.07756	0.00168	0.60674	0.01642	0.05671	0.00163	481.6	10.05	481.5	10.38	479.4	62.29
D8523-8	47.14	138.92	0.415419	0.07734	0.00175	0.62312	0.0184	0.0584	0.00184	480.3	10.47	491.8	11.51	544.9	67.56
D8523-9	50.15	157.58	0.786838	0.07755	0.00192	0.59983	0.02092	0.05607	0.00211	481.5	11.46	477.1	13.28	454.9	81.13
D8523-10	61.35	178.43	0.734125	0.07735	0.00173	0.6156	0.01768	0.05769	0.00177	480.3	10.35	487.1	11.11	517.8	66.33
D8523-11	64.1	194.92	0.776729	0.07684	0.00179	0.59148	0.0186	0.0558	0.00188	477.2	10.69	471.8	11.87	444.3	73.33
D8523-12	84.74	245.22	0.932877	0.07668	0.00163	0.60571	0.0158	0.05726	0.00159	476.3	9.78	480.9	9.99	501.1	60.34
D8523-13	19.65	58.08	0.629821	0.07374	0.00199	0.6051	0.02484	0.05948	0.00265	458.7	11.96	480.5	15.72	584.8	93.74
D8523-14	58.34	176.39	0.473836	0.07807	0.00197	0.63277	0.02257	0.05875	0.00227	484.6	11.79	497.8	14.04	558	82.15
D8523-15	49.96	142.99	0.898664	0.07834	0.00198	0.62144	0.02238	0.0575	0.00224	486.2	11.81	490.7	14.01	510.4	83.75
D8523-16	34.64	96.15	0.788664	0.07747	0.00168	0.62669	0.01704	0.05864	0.0017	481	10.05	494	10.64	553.7	62.12
D8523-17	113.83	319.03	1.04178	0.07759	0.00157	0.60337	0.01412	0.05637	0.00139	481.7	9.38	479.4	8.94	466.2	54.21
D8523-18	92.18	259.71	0.977359	0.07723	0.00157	0.62916	0.0149	0.05906	0.00148	479.6	9.42	495.6	9.28	569.1	53.55
D8523-19	75.78	208.2	0.863401	0.07784	0.00159	0.60847	0.01469	0.05667	0.00145	483.2	9.53	482.6	9.27	477.9	55.7
D8523-20	71.63	201.19	0.665689	0.07749	0.00162	0.43681	0.01459	0.04086	0.00141	481.1	9.7	368	10.31	-	-
D8523-21	68.09	190.97	0.817615	0.07731	0.0016	0.62474	0.01537	0.05858	0.00153	480	9.57	492.8	9.61	551.6	56.02
D8523-22	80.98	224.11	0.6881	0.07731	0.00157	0.61061	0.01439	0.05726	0.00143	480	9.38	483.9	9.08	500.9	54.48
D8523-23	51.6	141.96	0.897436	0.07776	0.00162	0.60913	0.0154	0.05679	0.00153	482.7	9.71	483	9.72	482.6	58.34
D8523-24	102.32	281.89	0.817305	0.07736	0.00155	0.61348	0.01412	0.05749	0.0014	480.4	9.29	485.8	8.89	509.8	52.95
D1203-1	492.66	2026.71	0.704413	0.0645	0.00141	0.86189	0.01995	0.09692	0.00234	402.9	8.55	631.2	10.88	1565.7	44.66
D1203-2	162.37	465	0.446731	0.08156	0.00182	0.62701	0.01644	0.05576	0.00152	505.4	10.84	494.2	10.26	442.4	59.49
D1203-3	206.49	636.32	0.409684	0.07786	0.00167	0.60243	0.01444	0.05612	0.00139	483.3	10	478.8	9.15	456.9	53.82
D1203-4	321.29	937.87	0.442002	0.07833	0.00166	0.82654	0.01851	0.07654	0.00176	486.1	9.93	611.7	10.29	1109.1	45.22
D1203-5	119.06	347.15	0.455336	0.07829	0.00177	0.56877	0.01564	0.0527	0.00152	485.9	10.58	457.2	10.12	315.8	64.01
D1203-6	398.86	1198.5	0.756696	0.07645	0.00161	0.58452	0.01332	0.05546	0.00129	474.9	9.65	467.4	8.54	430.6	50.65
D1203-7	73.15	216.41	0.872095	0.07742	0.0019	0.59007	0.01929	0.05529	0.00192	480.7	11.39	470.9	12.32	423.6	75.44
D1203-8	273.85	866.42	0.30828	0.07462	0.00159	0.57351	0.01362	0.05575	0.00136	463.9	9.56	460.3	8.79	442.3	53.19
D1203-9	91.03	273.74	0.52601	0.07666	0.00187	0.65932	0.02049	0.06239	0.00207	476.1	11.21	514.2	12.54	687.6	69.31
D1203-10	42.85	122.17	0.825653	0.07956	0.00214	0.56329	0.02253	0.05136	0.0022	493.5	12.79	453.7	14.63	257.2	95.29
D1203-11	321.64	972.37	0.748244	0.07591	0.00168	1.24065	0.02861	0.11856	0.00289	471.7	10.09	819.2	12.97	1934.7	42.94
D1203-12	162.99	462.6	0.411327	0.07787	0.00175	0.55646	0.01512	0.05184	0.00147	483.4	10.44	449.2	9.86	278.4	63.7
D1203-13	38.03	113.19	0.797685	0.07603	0.00213	0.65659	0.0258	0.06266	0.00268	472.4	12.76	512.5	15.81	696.6	88.46
D1203-14	69.87	202.68	0.57016	0.07876	0.00192	0.56933	0.01871	0.05245	0.00183	488.7	11.46	457.6	12.1	304.9	77.41
D1203-15	133.4	448.17	0.424482	0.06988	0.00166	0.51905	0.01586	0.0539	0.00175	435.4	9.97	424.5	10.6	366.6	71.27
D1203-16	339.03	1093.06	0.696988	0.07129	0.00153	0.87643	0.0199	0.08921	0.00211	443.9	9.22	639.1	10.77	1408.5	44.51
D1203-17	79.5	314.81	0.659128	0.05591	0.00134	0.82484	0.02188	0.10704	0.00311	350.7	8.2	610.7	12.17	1749.7	52.16
D1203-18	150.48	452.16	0.514353	0.07632	0.00167	0.57195	0.01457	0.05438	0.00144	474.1	10.01	459.3	9.41	386.6	58.26
D1203-19	24.08	68.8	0.74593	0.07732	0.00265	0.58281	0.03411	0.0547	0.00346	480.1	15.88	466.3	21.88	400.1	135.09
D1203-20	138.61	400.12	0.798036	0.07862	0.00183	0.57779	0.01701	0.05333	0.00166	487.9	10.92	463	10.95	342.9	68.89
D1203-21	196.31	629.23	0.80047	0.07416	0.0017	0.80661	0.02103	0.07893	0.00219	461.2	10.2	600.6	11.82	1170.3	54.03
D1203-22	141.33	381.1	0.591918	0.08239	0.00186	0.73304	0.01918	0.06457	0.00178	510.4	11.05	558.3	11.24	760.3	57.09
D1203-23	183.74	548.3	0.408754	0.07701	0.00178	0.6031	0.01722	0.05683	0.00172	478.3	10.66	479.2	10.91	484.4	66.04
D1203-24	108.55	323.9	0.614696	0.07546	0.00177	0.54984	0.01657	0.05288	0.00169	469	10.6	444.9	10.85	323.7	70.86
PM101.3-1	12.8789	162.704	0.695127	0.0768327	0.000469679	0.609413	0.0226809	0.057526	0.00212516	477.19	2.91706	483.19	17.9832	511.755	81.1877
PM101.3-2	24.5875	321.791	0.456797	0.0769124	0.000436954	0.610145	0.0149058	0.0575354	0.00140549	477.667	2.71372	483.652	11.8156	512.116	53.6822
PM101.3-3	27.6413	355.189	0.492864	0.0786547	0.000455944	0.580266	0.0115268	0.0535058	0.00105611	488.088	2.82934	464.632	9.22979	350.308	44.6143
PM101.3-4	17.5025	229.874	0.372622	0.0782418	0.000456165	0.566531	0.0167724	0.052515	0.00153018	485.62	2.83126	455.768	13.4932	307.899	66.3594
PM101.3-5	29.3864	383.978	0.430579	0.0776316	0.000435956	0.587913	0.0116341	0.0549254	0.00108085	481.97	2.7066	469.534	9.29156	409.189	44.0207
PM101.3-6	29.91	386.701	0.483607	0.0777104	0.000451388	0.607756	0.0114805	0.0567216	0.00105919	482.442	2.80231	482.144	9.10766	480.726	41.2574
PM101.3-7	14.1637	186.968	0.391774	0.0768851	0.000460422	0.636914	0.0228823	0.060081	0.00213868	477.503	2.8595	500.393	17.9775	606.493	76.986
PM101.3-8	37.8911	482.268	0.548713	0.0781619	0.000445588	0.598765	0.0106292	0.0555597	0.000983267	485.142	2.76571	476.449	8.45787	434.817	39.4128
PM101.3-9	34.9405	444.533	0.544884	0.0775144	0.000443076	0.616501	0.0112365	0.0576832	0.00104247	481.269	2.75096	487.652	8.88807	517.752	39.6764
PM101.3-10	36.9427	477.231	0.460572	0.0785042	0.000435708	0.606566	0.0114155	0.0560381	0.00104791	487.188	2.70395	481.392	9.0597	453.879	41.5079
PM101.3-11	8.721	111.361	0.59583	0.0779681	0.000506608	0.554977	0.0303085	0.0516247	0.00278919	483.983	3.14474	448.252	24.48	268.821	123.911
PM101.3-12	19.418	250.119	0.531524	0.0766221	0.000535329	0.615514	0.0511242	0.0582617	0.00473458	475.929	3.32513	487.032	40.4526	539.616	177.746
PM101.3-13	28.9625	382.631	0.540905	0.0765037	0.000465262	0.602841	0.012838	0.0571504	0.00119237	475.22	2.89008	479.035	10.2014	497.34	45.9649
PM101.3-14	27.438	356.918	0.526727	0.0778008	0.000431571	0.596757	0.0116057	0.0556304	0.00107941	482.983	2.67916	475.174	9.24118	437.648	43.1901
PM101.3-15	34.2809	462.447	0.512538	0.075061	0.000443387	0.600109	0.0136641	0.0579848	0.00131544	466.575	2.75607	477.303	10.8678	529.189	49.7083
PM101.3-16	22.6659	303.616	0.3169	0.0773121	0.000447329	0.611679	0.0141007	0.0573819	0.00132194	480.059	2.77763	484.618	11.1716	506.241	50.677
PM101.3-17	60.5311	801.541	0.517698	0.076073	0.000424388	0.601127	0.00951362	0.0573105	0.00090523	472.64	2.63671	477.949	7.56416	503.501	34.7618
PM101.3-18	92.8825	1235.1	0.428324	0.0773221	0.000425861	0.600002	0.00823047	0.0562792	0.000780187	480.119	2.64431	477.235	6.54643	463.402	30.7202
PM101.3-19	13.414	189.686	0.062798	0.076516	0.000458148	0.614657	0.0219076	0.0582612	0.00204579	475.293	2.84588	486.493	17.3396	539.598	76.8042
PM101.3-20	27.4219	355.021	0.605062	0.0769814	0.000432155	0.592111	0.0131231	0.0557849	0.00123241	478.08	2.68383	472.215	10.4658	443.816	49.1229
PM101.3-21	13.0222	174.393	0.371207	0.077514	0.000466015	0.618054	0.0217694	0.0578289	0.00202314	481.267	2.89338	488.627	17.2107	523.287	76.7342
PM101.3-22	320.298	4073.47	0.979251	0.0749572	0.00042638	0.748348	0.0101569	0.0724084	0.000991418	465.952	2.65048	567.265	7.69921	997.442	27.8171
PM101.3-23	15.9615	202.884	0.568078	0.0794089	0.000461472	0.631491	0.0176653	0.0576762	0.00160726	492.594	2.86263	497.024	13.9037	517.483	61.1828
PM101.3-24	277.743	3733.01	1.07895	0.0705255	0.000404565	0.752548	0.010802	0.0773904	0.00115004	439.321	2.52014	569.702	8.17741	1131.27	29.5905
PM101.3-25	21.1975	273.624	0.669197	0.0779554	0.000459916	0.611107	0.0144779	0.0568551	0.00132965	483.907	2.85492	484.258	11.4727	485.919	51.6245
PM101.3-26	29.9116	400.501	0.486284	0.0761974	0.000464552	0.593767	0.0143556	0.0565164	0.0012843	473.385	2.88608	473.27	11.4423	472.713	50.2768
PM101.3-27	22.7832	304.803	0.454399	0.0764568	0.000434409	0.603221	0.0148545	0.0572215	0.00139276	474.939	2.69849	479.275	11.8024	500.079	53.5979
PM101.3-28	30.522	400.956	0.445064	0.0777343	0.000427068	0.599836	0.0121603	0.0559653	0.00112554	482.585	2.6513	477.13	9.67272	450.991	44.663
PM101.3-29	93.3765	1130.1	1.03497	0.0774381	0.000440251	0.609056	0.00848018	0.0570428	0.000800184	480.813	2.73352	482.964	6.72455	493.188	30.9268
PM101.3-30	27.7818	354.49	0.643754	0.077486	0.000444488	0.606948	0.0139832	0.0568102	0.0012673	481.1	2.75976	481.633	11.0961	484.175	49.2573
PM101.3-31	27.9894	360.996	0.605896	0.0764933	0.000441612	0.620156	0.013455	0.0587998	0.00126038	475.158	2.74319	489.945	10.6299	559.693	46.7247
PM101.3-32	24.9076	327.367	0.476347	0.0766829	0.000535906	0.615688	0.014606	0.0582319	0.0012984	476.293	3.32862	487.141	11.5564	538.499	48.7787
PM101.3-33	92.8763	1122.49	0.921847	0.0779271	0.000436716	0.610545	0.00921538	0.0568235	0.000848273	483.738	2.71094	483.904	7.3039	484.688	32.9601
PM101.3-34	39.1267	510.516	0.442037	0.0769766	0.000445767	0.607738	0.0115886	0.0572607	0.00108584	478.051	2.76836	482.133	9.19347	501.589	41.7474
SRM004-1	116.465	1652.05	0.58297	0.0692162	0.000432494	0.525248	0.0128034	0.0550372	0.00132466	431.432	2.69578	428.651	10.4488	413.733	53.7985
SRM004-2	121.597	1612.12	0.602191	0.0735571	0.000460463	0.571599	0.0139758	0.0563593	0.00135564	457.551	2.86424	459.048	11.2239	466.553	53.2739
SRM004-3	68.3256	893.801	0.608296	0.0744536	0.000459167	0.581039	0.0138468	0.0566003	0.00132987	462.931	2.85497	465.129	11.0846	475.994	51.9541
SRM004-4	53.0015	724.455	0.360833	0.0747633	0.000482311	0.581694	0.0142117	0.0564293	0.00136195	464.789	2.99844	465.549	11.3741	469.299	53.4305
SRM004-5	61.1682	807.285	0.639488	0.074185	0.00045966	0.551172	0.0141979	0.0538852	0.00136964	461.32	2.8584	445.764	11.4826	366.256	57.2898
SRM004-6	61.9092	843.273	0.411291	0.0746002	0.000462654	0.565834	0.0133145	0.0550107	0.00127566	463.811	2.87645	455.316	10.714	412.66	51.8429
SRM004-7	189.624	2656.7	0.238954	0.0748273	0.00049475	0.557849	0.0126051	0.0540699	0.00119996	465.173	3.07567	450.126	10.171	373.963	49.9533
SRM004-8	64.434	792.193	1.17383	0.0735073	0.000472043	0.558015	0.0168511	0.0550572	0.00162109	457.252	2.93634	450.233	13.5963	414.546	65.8041
SRM004-9	88.2574	1173.02	0.514499	0.0750742	0.000481207	0.57212	0.0131188	0.0552707	0.00124858	466.654	2.99114	459.384	10.5338	423.19	50.411
SRM004-10	77.8923	1066.98	0.466309	0.0742596	0.000456321	0.57101	0.0131179	0.0557687	0.00126224	461.767	2.83754	458.668	10.537	443.171	50.3321
SRM004-11	112.261	1567.67	0.291167	0.0747869	0.000461239	0.557785	0.0125881	0.0540929	0.00120471	464.931	2.8674	450.084	10.1575	374.918	50.121
SRM004-12	78.9134	1018.78	0.493944	0.0785977	0.000488569	0.617579	0.0145272	0.0569877	0.00131988	487.747	3.03187	488.329	11.4869	491.057	51.0809
SRM004-13	103.706	1443.04	0.353252	0.0740053	0.000466898	0.56412	0.0126953	0.0552851	0.001231	460.241	2.90365	454.205	10.2217	423.77	49.6834
SRM004-14	53.2398	727.76	0.434858	0.0737388	0.000471086	0.558792	0.0136057	0.0549608	0.00131219	458.641	2.93007	450.74	10.9748	410.629	53.395
SRM004-15	62.3018	854.124	0.41243	0.0740042	0.000457521	0.550289	0.0127587	0.0539304	0.0012337	460.234	2.84534	445.186	10.3218	368.143	51.5435
SRM004-16	38.7642	414.223	0.410416	0.0960831	0.000617122	0.77328	0.0212675	0.0583699	0.00158151	591.413	3.79853	581.643	15.9969	543.674	59.2223
SRM004-17	106.018	1374.85	0.248185	0.0805637	0.000499052	0.623329	0.0145796	0.0561147	0.00129227	499.486	3.09407	491.931	11.5063	456.909	51.0901
SRM004-18	65.8464	898.931	0.2819	0.0763388	0.000496131	0.590649	0.0151238	0.0561155	0.00141162	474.232	3.08207	471.282	12.0673	456.943	55.8077
SRM004-19	44.5608	631.913	0.062798	0.0762142	0.000473816	0.597014	0.0156004	0.056813	0.00145948	473.486	2.94361	475.337	12.4209	484.282	56.7231
SRM004-20	220.625	3096.54	0.0746848	0.0769373	0.000659295	0.634695	0.0146064	0.0598311	0.0013173	477.816	4.09452	499.016	11.484	597.472	47.6888
SRM004-21	43.0867	574.221	0.393164	0.0756315	0.000469984	0.591503	0.018121	0.0567223	0.00172322	469.994	2.92061	471.827	14.4547	480.751	67.1214
SRM004-22	95.0135	852.141	0.36518	0.113377	0.000761508	0.971308	0.0221619	0.0621344	0.00138313	692.328	4.65011	689.138	15.7237	678.738	47.5692
SRM004-23	371.726	5589.61	0.143584	0.0704216	0.000455948	0.541839	0.0121575	0.0558037	0.0012298	438.695	2.84035	439.636	9.8643	444.566	48.996
SRM004-24	149.642	1397.83	0.0764612	0.113576	0.00136642	1.00196	0.0251893	0.063983	0.00144133	693.483	8.34318	704.807	17.7188	741.068	47.6503
SRM004-25	109.807	1011.84	0.304828	0.111796	0.000852628	0.939057	0.0218651	0.0609206	0.00135677	683.17	5.21029	672.388	15.6559	636.434	47.9263
SRM004-26	168.099	3293.65	0.191139	0.0537515	0.000402128	0.400177	0.00909283	0.0539959	0.00119103	337.512	2.52502	341.776	7.76586	370.877	49.6763
SRM004-27	87.2209	1249.05	0.212121	0.0733434	0.000490706	0.572029	0.0145595	0.056566	0.00140893	456.267	3.05267	459.326	11.6909	474.653	55.0889
SRM004-28	170.221	2397.96	0.291229	0.073677	0.000478285	0.566995	0.0128001	0.0558144	0.00124106	458.27	2.97493	456.069	10.296	444.991	49.4315
SRM004-29	117.636	1620.56	0.408173	0.0741866	0.000463401	0.572281	0.0128344	0.0559477	0.00123823	461.33	2.88166	459.489	10.3048	450.294	49.1562
SRM004-30	205.985	2971	0.176983	0.0724069	0.000468216	0.644363	0.0145621	0.0645431	0.00142953	450.64	2.91405	505.004	11.4127	759.476	46.7109
BC0001-1	41.3045	565.666	0.459419	0.0731918	0.000418525	0.57794	0.010149	0.0572689	0.00100686	455.357	2.60382	463.137	8.13295	501.905	38.7032
BC0001-2	40.6691	556.31	0.405674	0.0736421	0.000417786	0.585252	0.0100386	0.0576388	0.000971379	458.061	2.59867	467.831	8.02452	516.061	37.0099
BC0001-3	36.5378	501.364	0.395271	0.0743403	0.000414516	0.570782	0.00954935	0.0556858	0.000928581	462.252	2.57748	458.52	7.67118	439.862	37.104
BC0001-4	33.6055	455.178	0.461067	0.0745203	0.000422477	0.562353	0.0100092	0.054731	0.000968359	463.331	2.62676	453.057	8.06389	401.25	39.6345
BC0001-5	26.2023	352.692	0.347793	0.0763229	0.000430501	0.5803	0.0131297	0.0551437	0.00123762	474.137	2.67438	464.654	10.5131	418.056	50.1284
BC0001-6	37.5759	509.481	0.40114	0.0751926	0.000419653	0.558818	0.00938011	0.0539007	0.000894344	467.364	2.60838	450.757	7.56624	366.903	37.3941
BC0001-7	40.0183	530.678	0.544668	0.0749929	0.000442257	0.759004	0.0118351	0.0734046	0.00111083	466.166	2.74913	573.436	8.94152	1025.14	30.6155
BC0001-8	39.7751	561.926	0.474905	0.0715139	0.000405878	0.562203	0.0105355	0.0570166	0.00106767	445.27	2.52714	452.959	8.48832	492.176	41.2912
BC0001-9	35.0621	483.387	0.385894	0.0737039	0.000420974	0.574994	0.010305	0.0565812	0.00101318	458.432	2.61842	461.239	8.26633	475.246	39.6007
BC0001-10	37.0508	507.47	0.445269	0.0728957	0.000414667	0.606766	0.010351	0.0603696	0.00104843	453.578	2.58018	481.519	8.21433	616.848	37.4949
BC0001-11	29.7035	397.769	0.397266	0.0748904	0.000429073	0.571449	0.0146356	0.0553414	0.00139384	465.552	2.66731	458.952	11.7544	426.043	56.1763
BC0001-12	31.4998	420.161	0.47041	0.0737362	0.000414858	0.659428	0.0126316	0.0648612	0.00122384	458.626	2.58034	514.264	9.85092	769.837	39.7271
BC0001-13	42.6331	557.256	0.476265	0.0750163	0.000419746	0.581558	0.0122302	0.0562258	0.00117191	466.307	2.60917	465.462	9.78868	461.297	46.205
BC0001-14	31.1307	422.302	0.420922	0.0737064	0.000420053	0.581264	0.0146519	0.0571961	0.00141798	458.447	2.61269	465.273	11.7281	499.102	54.6021
BC0001-15	41.495	548.886	0.539761	0.0726161	0.000416965	0.634326	0.0124863	0.0633546	0.00122857	451.897	2.59482	498.787	9.81828	720.156	41.1593
BC0001-16	31.2921	404.683	0.475827	0.0750609	0.000425081	0.574455	0.0114638	0.0555062	0.00109355	466.574	2.64228	460.892	9.19752	432.669	43.892
BC0001-17	34.2956	451.524	0.471648	0.0730336	0.000436525	0.608342	0.0126792	0.060412	0.001234	454.407	2.71601	482.514	10.0567	618.365	44.089
BC0001-18	37.2429	487.505	0.442951	0.0737226	0.000412695	0.629368	0.0114776	0.061916	0.00112095	458.544	2.56691	495.702	9.04	671.208	38.7361
BC0001-19	27.1394	395.202	0.062798	0.0734095	0.000415044	0.648388	0.0123726	0.0640592	0.00119797	456.664	2.5819	507.486	9.68393	743.586	39.5417
BC0001-20	37.453	486.956	0.605106	0.0734058	0.00040975	0.553068	0.010847	0.0546445	0.00106212	456.642	2.54897	447.004	8.76687	397.707	43.5678
BC0001-21	26.4183	358.555	0.373603	0.07351	0.000425703	0.584496	0.0116543	0.0576679	0.00115026	457.268	2.64808	467.347	9.31847	517.166	43.7951
BC0001-22	41.539	554.513	0.482061	0.0734175	0.00040927	0.613792	0.00966057	0.0606345	0.000945136	456.712	2.54597	485.949	7.64842	626.295	33.6
BC0001-23	26.9036	359.429	0.378936	0.073762	0.000429109	0.694868	0.0147007	0.0683232	0.00143084	458.781	2.66895	535.721	11.3337	878.375	43.3381
BC0001-24	34.6022	450.846	0.627675	0.0734258	0.00043063	0.75437	0.0134653	0.0745135	0.00127791	456.762	2.67883	570.757	10.1878	1055.41	34.5381
BC0001-25	33.3617	458.303	0.495956	0.0697232	0.000424001	0.774518	0.0228789	0.0805662	0.0023145	434.488	2.64221	582.351	17.2024	1210.88	56.5439
BC0001-26	36.7413	504.884	0.470408	0.0729967	0.000412208	0.572838	0.00948682	0.0569151	0.000935917	454.185	2.56475	459.849	7.61559	488.246	36.2847
BC0001-27	29.3783	395.027	0.493251	0.0741585	0.000422618	0.641346	0.012345	0.0627234	0.00121355	461.161	2.62808	503.139	9.6847	698.868	41.2082
BC0001-28	36.3454	492.961	0.494783	0.073371	0.000414765	0.615644	0.0107046	0.060856	0.00106233	456.433	2.58021	487.113	8.46973	634.15	37.5796
BC0001-29	30.0095	411.133	0.465782	0.0736106	0.000412606	0.556218	0.0104663	0.0548028	0.00101982	457.872	2.56648	449.061	8.44997	404.187	41.6644
BC0001-30	41.5449	556.277	0.36678	0.0758013	0.000429285	0.55349	0.0121868	0.052958	0.00113836	471.012	2.66748	447.28	9.84823	326.999	48.788
BC0001-31	32.4837	431.278	0.438508	0.0750547	0.000426085	0.596232	0.0115732	0.057615	0.00111428	466.537	2.64853	474.84	9.21688	515.154	42.4784
D0006-1	275.43	888.93	0.672955	0.07073	0.0009	0.52587	0.00915	0.05401	0.00099	441.2	5.36	425.7	5.87	344.5	39.8
D0006-2	141.19	462.76	0.412784	0.07136	0.00106	0.52331	0.01171	0.05327	0.00128	440.2	6.52	421.4	8.11	321.5	56.53
D0006-3	119.15	374.64	0.552931	0.07296	0.0012	0.55321	0.01434	0.05508	0.00155	455.1	6.96	445.1	8.8	395.6	57.88
D0006-4	211	688.56	0.685256	0.07137	0.00096	0.54316	0.01031	0.05528	0.00112	444.3	5.7	435.3	6.55	389.6	43.41
D0006-5	354.42	1139.41	0.632907	0.07067	0.0009	0.53121	0.00919	0.0546	0.001	443.3	5.11	431.9	5.32	373.4	35.29
D0006-6	207.2	642.89	0.672821	0.07076	0.0011	0.55236	0.01295	0.0567	0.00144	444.3	6.16	453	7.56	498.6	48.9
D0006-7	421.53	1346.77	0.649777	0.07388	0.00091	0.55842	0.00901	0.0549	0.00093	443.7	5.16	429.6	5.41	355.8	36.16
D0006-8	169.58	550.24	0.595431	0.07304	0.00116	0.55294	0.01358	0.05498	0.00146	446.5	6.52	428.8	8.08	336.2	55.44
D0006-9	300.72	1000.44	0.72696	0.07025	0.00086	0.52725	0.00837	0.05452	0.00091	434.1	5.24	422.3	5.77	359.9	39.39
D0006-10	213.21	713.3	0.705818	0.0713	0.00098	0.53895	0.01069	0.0549	0.00116	442.6	5.86	434.4	6.91	392.2	46.04
D0006-11	270.79	848.79	0.629744	0.07543	0.00096	0.57714	0.00989	0.05557	0.00101	464.2	5.79	447.6	6.41	364.6	41.92
D0006-12	375.38	1252.18	0.485976	0.07143	0.00086	0.54288	0.00836	0.0552	0.00089	441.2	5.28	430.6	5.74	375.6	38.39
D0006-13	225.89	772.09	0.678367	0.06859	0.00098	0.52039	0.01094	0.0551	0.00124	437.6	5.55	425	6.38	358.7	43.62
D0006-14	137.56	460.29	0.561211	0.07108	0.0011	0.54654	0.01281	0.05584	0.00142	441.8	6.86	435	8.82	400.1	59.19
D0006-15	158.16	523.74	0.551037	0.07063	0.00105	0.53452	0.01187	0.05496	0.00131	443.1	6.04	429.5	7.25	358.3	49.44
D0006-16	257.62	801.13	0.464881	0.07379	0.00098	0.55958	0.01032	0.05507	0.00108	454.1	6.29	447	7.61	411.8	49.11
D0006-17	116.48	403.22	0.479441	0.06605	0.00107	0.50428	0.01275	0.05545	0.00152	427.1	6.16	418.1	7.78	369.6	54.16
D0006-18	166.72	536.11	0.62836	0.07557	0.00114	0.57773	0.01311	0.05552	0.00136	461.1	6.56	442.7	7.96	349	53.17
D0006-19	262.47	858.34	0.682935	0.0741	0.00094	0.56522	0.00972	0.0554	0.00101	459.1	5.8	452.2	6.59	418.4	41.75
D0006-20	236.98	783.23	0.532321	0.07193	0.00108	0.5479	0.01233	0.05532	0.00134	448	5.85	438.9	6.85	392.9	45.15
D0006-21	233.97	736.9	0.547931	0.07482	0.00099	0.56554	0.01047	0.05489	0.00108	455.8	5.94	443	6.9	377.8	45.5
D0006-22	278.73	888.06	0.801117	0.07477	0.0009	0.57019	0.00888	0.05538	0.0009	463.1	5.59	454	6.11	409.3	38.65
D0006-23	123.89	394.33	0.592017	0.0764	0.00113	0.56275	0.01262	0.05349	0.00129	467.9	7.19	434.6	8.95	263.3	61.51
D0006-24	142.95	460.84	0.596237	0.07023	0.00123	0.53084	0.01485	0.05489	0.00167	434.6	6.67	416.6	8.5	318.9	59.92
YC2008-1	51.7657	689.966	0.979089	0.068151	0.000535706	0.536857	0.00634352	0.0571328	0.000731209	425.006	3.34079	436.35	5.15593	496.664	28.1995
YC2008-2	33.9586	436.589	0.477617	0.0713762	0.000633587	0.544292	0.00764665	0.0553067	0.00078256	444.441	3.94519	441.251	6.19904	424.643	31.5671
YC2008-3	37.1544	498.407	0.550875	0.069406	0.000568992	0.555008	0.00519076	0.0579964	0.000515095	432.576	3.54627	448.272	4.19251	529.624	19.4592
YC2008-4	33.9668	387.674	0.725395	0.0711008	0.00111126	0.550731	0.011399	0.0561777	0.00137007	442.784	6.92042	445.476	9.22041	459.4	54.0818
YC2008-5	28.9472	354.037	0.631107	0.0716545	0.000621233	0.547616	0.0145141	0.0554282	0.00144209	446.116	3.86775	443.433	11.7529	429.538	57.9946
YC2008-6	36.6133	476.094	0.586274	0.0716544	0.000682511	0.541693	0.00552855	0.0548288	0.000538518	446.115	4.24927	439.54	4.48598	405.249	21.9866
YC2008-7	34.9722	450.394	0.559876	0.0714172	0.000638147	0.540106	0.0064324	0.0548498	0.000638885	444.688	3.9735	438.495	5.22225	406.106	26.0704
YC2008-8	26.4087	342.196	0.55678	0.0706136	0.000573588	0.535385	0.0083825	0.0549891	0.000838856	439.852	3.57287	435.377	6.81668	411.779	34.11
YC2008-9	38.1672	495.254	0.603169	0.0713456	0.000642054	0.52883	0.00642344	0.0537585	0.000646992	444.257	3.99797	431.033	5.23555	360.948	27.1519
YC2008-10	39.2434	522.145	0.64791	0.0692885	0.000649542	0.544646	0.0060724	0.0570101	0.000615728	431.868	4.04852	441.483	4.92221	491.924	23.8164
YC2008-11	34.081	603.632	0.441971	0.0514739	0.000684729	0.421538	0.00481677	0.0593947	0.00063185	323.564	4.3042	357.15	4.08103	581.596	23.1038
YC2008-12	36.1011	474.655	0.576496	0.0704467	0.000528504	0.525753	0.00699693	0.0541278	0.000701665	438.846	3.29231	428.987	5.70913	376.37	29.166
YC2008-13	26.3849	325.062	0.811687	0.071927	0.000652187	0.544387	0.00762498	0.0548928	0.000753744	447.755	4.05995	441.313	6.18127	407.858	30.7239
YC2008-14	42.8516	565.79	0.925895	0.0695931	0.000697401	0.549514	0.0054227	0.0572679	0.000520999	433.704	4.3462	444.678	4.38817	501.865	20.0274
YC2008-15	26.8873	346.559	0.504087	0.0706844	0.000560928	0.557325	0.0124152	0.0571852	0.00112475	440.278	3.4939	449.784	10.0196	498.682	43.3218
YC2008-16	35.5509	463.051	0.584652	0.0711489	0.000647763	0.561648	0.006338	0.0572526	0.000622285	443.074	4.03389	452.599	5.10741	501.276	23.9297
YC2008-17	42.6772	517.719	1.14704	0.0693742	0.00070446	0.561622	0.00736543	0.0587144	0.00077334	432.385	4.39064	452.582	5.93541	556.524	28.7264
YC2008-18	33.9824	445.128	0.578561	0.0714786	0.000665346	0.538786	0.00612598	0.0546688	0.000607866	445.058	4.14274	437.624	4.97577	398.701	24.9191
YC2008-19	35.7717	458.55	0.528849	0.0711085	0.000603004	0.567793	0.00817223	0.0579118	0.000797651	442.831	3.75523	456.586	6.57163	526.426	30.1941
YC2008-20	29.8508	395.732	0.466213	0.0707417	0.000602827	0.558393	0.00763718	0.0572484	0.000739688	440.622	3.75478	450.48	6.16124	501.116	28.4472
YC2008-21	26.9539	351.823	0.596208	0.0717134	0.000653586	0.547656	0.0068238	0.0553868	0.000669851	446.47	4.06907	443.46	5.52552	427.87	26.9664
YC2008-22	31.0019	420.493	0.514911	0.0677514	0.000529365	0.587056	0.00900307	0.0628434	0.000940005	422.595	3.30187	468.986	7.19235	702.937	31.8374
YC2008-23	45.6525	614.032	0.633172	0.06772	0.000672422	0.555182	0.00487628	0.059459	0.000501113	422.405	4.19425	448.386	3.93827	583.942	18.2963
YC2008-24	42.0593	520.604	0.882887	0.0691993	0.000605879	0.55243	0.00718006	0.0578995	0.000742283	431.33	3.77654	446.587	5.8044	525.959	28.1064
YC2008-25	34.9365	455.204	0.573993	0.0707897	0.000603858	0.565469	0.00634785	0.0579345	0.000605511	440.911	3.76111	455.08	5.10865	527.286	22.9085
YC2008-26	20.9897	280.616	0.449623	0.0696449	0.000864963	0.558004	0.0123553	0.0581094	0.00114376	434.016	5.39031	450.226	9.96889	533.889	43.0937
YC2008-27	34.6688	451.117	0.56083	0.0701294	0.000616851	0.54113	0.0063945	0.0559629	0.000593434	436.936	3.84324	439.169	5.18964	450.895	23.5497
YC2008-28	39.4348	485.138	0.710418	0.0707617	0.000531726	0.555336	0.00701884	0.0569189	0.000719243	440.743	3.31188	448.486	5.66838	488.394	27.8819
YC2008-29	38.615	485.312	0.711805	0.0705044	0.000694326	0.563271	0.00773716	0.0579429	0.000775022	439.194	4.32517	453.654	6.23144	527.604	29.3159

## Sheet: Table DR2
Table DR2: Major and trace elements for these samples from this study.
	meta gabbro-diorite					meta granitoid
SAMPLE	D8520-YQ1	D8521-YQ1	D8522-YQ1	D8523-YQ1	D8524-YQ1	D1203-1YQ1	D1203-3YQ1	QL11xy-1-⑵	QL11xy-1-⑶
SiO2	51.33	59.71	54.3	55.54	51.6	72.29	74.91	72.75	72.533
Al2O3	15.08	14.36	16.32	17.13	15.51	13.62	13.37	13.604	14.156
TiO2	1.99	1.67	1.21	0.91	1.48	0.38	0.35	0.32	0.282
Fe2O3	3.63	2.98	2.41	2.22	2.71	1.71	0.27	0.681674	0.291749
FeO	6.86	5.37	5.69	4.92	7.34	0.57	0.5	1.7244	1.916
CaO	7.71	4.03	8.21	7.79	7.97	0.99	0.82	1.959	2.034
MgO	4.84	2.34	4.74	4.21	5.14	0.62	0.37	0.613	0.54
K2O	1.9	3.31	1.63	1.64	1.82	5.02	3.92	4.258	4.027
Na2O	2.53	2.4	2.2	2.54	2.3	2.98	4.19	3.061	3.312
MnO	0.17	0.11	0.14	0.12	0.17	0.02	0.01	0.036	0.041
P2O5	0.57	0.3	0.24	0.16	0.29	0.11	0.08	0.1113	0.0649
LOI	2.24	2.01	1.87	1.86	1.87	0.88	0.5	0.731633	0.682925
K2O+Na2O	4.58545	5.9122	3.94479	4.3013	4.27696	8.13752	8.20933	7.3841	7.39836
A/CNK	0.745142	0.96637	0.803482	0.85147	0.766097	1.12207	1.0587	1.02996	1.04802
A/NK	2.4246	1.90641	3.03102	2.87681	2.69525	1.31744	1.20042	1.41027	1.44313
Y	47.4	45.7	31	23.1	33.6	33.1	31.1	30.88	26.96
La	54.1	40.5	28.8	29.3	33.6	54.1	53.7	40.6	31.6
Ce	106	94.9	66.1	63.6	76.6	102	99.5	80.232	64.644
Pr	13.9	12.1	8.44	7.82	10	12.4	12.1	10.22	7.866
Nd	56.1	45.2	33.5	29.2	40.2	41.6	38.9	38.04	29.23
Sm	11.3	9.52	7.58	5.96	8.57	8.55	8.42	7.574	5.692
Eu	3.12	2.27	1.97	1.68	2.26	1.29	1.08	0.999	0.925
Gd	9.99	9.06	7.16	5.4	7.77	7.01	6.58	6.36944	4.79306
Tb	1.51	1.35	1.13	0.81	1.2	1.12	1.1	1.095	0.833
Dy	8.69	7.79	6.35	4.96	7.25	6.52	6.52	6.377	5.126
Ho	1.78	1.55	1.32	1.01	1.44	1.32	1.3	1.201	1.06
Er	4.93	4.36	3.59	2.86	3.94	3.81	3.64	3.39246	3.055
Tm	0.69	0.66	0.52	0.41	0.58	0.56	0.56	0.586	0.542
Yb	4.41	4.4	3.33	2.79	3.66	3.84	3.54	3.889	3.546
Lu	0.66	0.66	0.48	0.42	0.54	0.55	0.52	0.566	0.534
Zn	103	90.6	74.1	65.5	95.7	12.5	9.61	115.2	104
Ga	20	19.9	19.2	17.7	20.1	16.2	13.9	15.56	14.83
Cs	30	26.4	32.7	22.8	33.5	6.95	5.76	8.123	7.66
Rb	67.1	144	72.2	61.7	80.7	160	107	162	140.6
Sr	381	218	399	359	343	153	163	95.78	89.27
Ba	967	813	543	503	650	940	1536	605.8	546.6
Zr	341	201	203	176	200	225	229	141.24	137.66
Nb	18.5	16.6	13.8	10.6	10.3	14.3	15	14.19	11.53
Ta	1.11	1.2	0.84	0.74	0.72	1.58	1.59	1.303	1.052
Hf	8.75	6.07	5.58	5.1	5.83	6.71	7.08	4.91105	5.22398
Th	5.89	10.7	4.96	8.63	6.88	22.8	26.4	20.11	15.22
U	1.65	3.15	1.53	1.33	2.13	2.82	2.29	2.0768	1.63768
Pb	6.55	12.1	7.34	7.94	13.1	10.7	5.75	34.88	31.57
V	254	218	185	143	240	30.1	20.8	36.34	28.67
Cr	56.3	8	62.2	50.4	14.8	5.4	4.05	16.16	14.1
Co	27.6	20	25.3	22.2	31	5.83	1.82	4.1472	3.564
Ni	25.2	6.28	19.9	17.1	8.29	2.93	1.73	7.933	7.35
Cu	36.7	20.7	16.4	16.2	11.4	3.66	3.18	11.63	10.58
(La/Yb)N	8.2898	6.21997	5.84432	7.09658	6.2036	9.52032	10.2508	7.05462	6.02191
Eu*	0.897388	0.746949	0.817189	0.904975	0.84636	0.509208	0.439541	0.541191	0.537095
Sr/Y	8.03797	4.77024	12.871	15.5411	10.2083	4.62236	3.10168	3.3112	3.3112
Zr/Y	7.19409	4.39825	6.54839	7.61905	5.95238	6.79758	4.57383	5.10608	5.10608
Nb/Ta	16.6667	13.8333	16.4286	14.3243	14.3056	9.05063	9.43396	10.8903	10.9601
Zr/Hf	38.9714	33.1137	36.3799	34.5098	34.3053	33.532	32.3446	28.7596	26.3516
	meta granitoid			syenogranite
SAMPLE	QL11xy-1-⑷	QL11xy-1-⑼	QL11xy-1-⑾	D3223-b3	D3223-b2	D3221-b1	D3221-b3	D3221-b5	D3663
SiO2	73.016	72.182	73.34	65.901	66.3	66.56	64.182	66.269	66.65
Al2O3	13.491	13.764	13.16	14.386	14.326	14.154	14.444	14.046	14.15
TiO2	0.325	0.327	0.323	0.484	0.471	0.467	0.548	0.464	0.47
Fe2O3	0.406824	1.95307	0.35	1.73321	1.71913	1.71029	2.12144	1.51459	1.78
FeO	2.1076	0.8143	1.99	2.13155	1.93995	2.0118	2.395	2.1555	1.91
CaO	1.943	2.414	2.215	3.659	2.983	3.486	4.004	3.387	2.96
MgO	0.608	0.772	0.699	2.133	2.011	1.999	2.466	2.05	2.04
K2O	3.977	3.288	3.524	4.455	4.756	4.606	4.173	4.367	4.88
Na2O	3.08	3.321	3.059	2.935	2.968	2.754	3.007	2.867	3.12
MnO	0.041	0.051	0.04	0.083	0.08	0.081	0.101	0.082	0.081
P2O5	0.1091	0.0718	0.0923	0.1731	0.1679	0.1688	0.2068	0.1647	0.18
LOI	0.764218	0.930493	1.09115	1.69688	2.05559	1.81357	2.16616	2.45954	1.24
K2O+Na2O	7.12076	6.67858	6.66347	7.53514	7.90406	7.51037	7.35292	7.42964	8.1449
A/CNK	1.04532	1.02617	1.02209	0.882297	0.926872	0.89264	0.862558	0.900185	0.895638
A/NK	1.43929	1.52529	1.48728	1.4904	1.42794	1.48705	1.52596	1.48709	1.35836
Y	33.07	42.34	28.6	18.17	17.66	18	21.6	17.63	16.3
La	47.92	27.23	25.21	39.54	36.73	40.22	40.63	34.27	39.3
Ce	96.192	53.964	49.788	71.232	67.968	72.204	78.9	65.652	72.2
Pr	11.91	6.858	6.208	8.137	7.741	8.068	9.243	7.608	7.45
Nd	44.78	26.16	23.42	28.16	26.75	27.91	32.66	26.71	26.6
Sm	8.786	5.412	4.86	4.654	4.511	4.521	5.457	4.494	4.36
Eu	0.918	0.893	0.91	1.195	1.195	1.196	1.408	1.2	1.11
Gd	7.19288	5.05344	4.277	3.9668	3.83896	3.8822	4.7611	3.79478	3.94
Tb	1.215	1.044	0.837	0.638	0.611	0.625	0.752	0.596	0.52
Dy	6.73	7.216	5.326	3.685	3.5	3.468	4.319	3.406	3.2
Ho	1.301	1.631	1.075	0.711	0.685	0.676	0.827	0.681	0.64
Er	3.6096	4.98482	3.08414	2.0116	1.94486	1.98622	2.41392	1.90162	1.81
Tm	0.598	0.963	0.552	0.35	0.339	0.345	0.396	0.338	0.27
Yb	4.059	6.583	3.507	2.408	2.307	2.406	2.79	2.311	1.96
Lu	0.602	0.882	0.546	0.374	0.357	0.373	0.433	0.354	0.31
Zn	97.04	97.39	99.62	93.68	101	113.6	110.8	104.9	36.6
Ga	14.54	14.48	14.54	13.87	13.75	13.98	14.7	13.39	14.7
Cs	8.268	9.118	7.729	10.32	9.792	10.59	12.3	9.96	10.5
Rb	142.7	124.6	126	159.9	183.4	165.4	160.4	160.8	203
Sr	83.51	93.26	88.1	404.566	448.366	429.24	396.609	385.659	362
Ba	511.1	440.6	441.9	1123	1112	997.8	870.3	823.7	976
Zr	154.23	121.98	131.04	149.65	141.16	140.47	166.45	146.09	165
Nb	13.4	11.36	12.39	17.41	17.12	18.18	20.71	17.12	13.9
Ta	1.149	1.601	1.11	1.655	1.589	1.637	1.897	1.536	1.33
Hf	5.43747	4.36852	4.50295	6.77111	6.4352	6.16668	7.17944	6.33954	5.32
Th	23.81	12.18	12.25	18.42	19.17	19.53	32.57	24.39	18
U	2.33288	1.7468	1.43792	3.54552	3.53848	2.61624	2.78872	3.09584	3.08
Pb	29.67	23.41	24.78	20.93	23.47	25.68	28.12	22.94	21.6
V	35.41	38.38	38.07	85.45	83.22	89.66	98.44	78.25	74
Cr	15.88	18.94	17.16	34.14	32.85	35.84	40.51	33.15	26.8
Co	3.8712	4.6116	3.9816	7.08	7.4988	9.228	11.3412	8.9232	8.74
Ni	6.848	7.569	7.772	10.5	10.84	11.38	13.18	11.8	7.12
Cu	12.37	11.3	13.42	12.97	14.63	12.44	16.65	12.61	5.6
(La/Yb)N	7.9778	2.79518	4.85761	11.096	10.7587	11.2962	9.84075	10.0207	13.5495
Eu*	0.343283	0.531761	0.800991	0.849928	0.878285	1.02706	0.719446	0.821411	0.892157
Sr/Y	2.52525	2.20265	3.08042	22.2656	25.3888	23.8467	18.3615	21.8752	22.2086
Zr/Y	4.66374	2.88096	4.58182	8.2361	7.9932	7.80389	7.70602	8.28644	10.1227
Nb/Ta	11.6623	7.09557	11.1622	10.5196	10.7741	11.1057	10.9172	11.1458	10.4511
Zr/Hf	28.3643	27.9225	29.1009	22.1013	21.9356	22.7789	23.1843	23.0443	31.015
	syenogranite	hornblende syenite
SAMPLE	D3664	D0002-YQ1	D0007-YQ1	D0003-YQ1	D0006-YQ1	D0013-YQ1	D1203-2YQ1	D1203-4YQ1
SiO2	65.44	53.3	57.48	60.72	60.46	55.26	63.23	61.5
Al2O3	14.01	15.05	16.79	16.05	16.45	15.14	17.62	17.98
TiO2	0.54	0.89	0.7	0.64	0.65	0.85	0.55	0.5
Fe2O3	1.95	2.92	2.61	2.53	0.13	2.28	1.67	2.12
FeO	2.4	4.85	3.5	2.53	4.93	5.16	1.66	1.23
CaO	3.06	7.34	5.99	3.21	3.37	5.08	1.46	1.63
MgO	2.31	5.03	3.16	2.31	2.37	4.58	0.98	0.8
K2O	4.68	5.16	3.64	5.95	5.92	5.71	6.5	8.54
Na2O	3.13	2.45	3.33	3.23	3.1	2.68	3.89	3.26
MnO	0.09	0.15	0.15	0.1	0.1	0.15	0.06	0.05
P2O5	0.2	0.45	0.33	0.24	0.24	0.42	0.11	0.15
LOI	1.62	1.25	1.11	1.35	1.36	1.69	1.05	1.07
K2O+Na2O	7.98487	7.79793	7.13554	9.41442	9.23045	8.62193	10.6313	12.0704
A/CNK	0.887804	0.655392	0.826658	0.912299	0.932674	0.763559	1.09492	1.0231
A/NK	1.37126	1.56479	1.78242	1.3652	1.42917	1.4294	1.31122	1.23063
Y	20.1	27.2	23.9	29.8	30.1	28.7	44.8	18.8
La	44.3	53.4	37.2	108	98.4	72.7	327	169
Ce	83.5	102	77.7	189	178	133	586	306
Pr	8.69	12.9	9.41	20.8	19.7	15.5	70.9	32.9
Nd	30.8	49.9	31.8	66.6	60.7	55.5	271	149
Sm	4.99	10.4	7.28	11.9	11	11.1	23.3	13.6
Eu	1.21	2.29	1.7	1.88	1.79	2.23	3.06	3.35
Gd	4.78	7.79	5.48	8.53	7.96	8.21	13.3	7.21
Tb	0.66	1.06	0.8	1.16	1.14	1.14	1.68	0.87
Dy	3.92	5.63	4.53	6	6.13	6.09	8.73	4.35
Ho	0.74	1.09	0.89	1.16	1.21	1.16	1.68	0.79
Er	2.26	2.82	2.68	3.43	3.34	3.16	4.23	2.04
Tm	0.33	0.41	0.41	0.52	0.5	0.45	0.64	0.32
Yb	2.32	2.68	2.73	3.45	3.41	3.19	4.21	2.12
Lu	0.36	0.39	0.39	0.51	0.52	0.45	0.62	0.33
Zn	47.2	91.4	74.7	59.2	61.5	91.6	55.2	27.5
Ga	15.7	18.3	18.8	18.8	19.2	18.2	21.4	17.7
Cs	13.4	24.6	16.9	11.5	11.2	22.2	15.4	9.24
Rb	218	333	169	334	336	337	147	156
Sr	361	566	653	495	529	390	279	237
Ba	963	1649	2145	1480	1360	1809	944	888
Zr	158	138	173	443	489	290	709	732
Nb	16.4	17.5	24	68.2	67.1	27.4	26.8	9.82
Ta	1.43	0.85	1.89	4.41	4.36	1.5	1.48	0.5
Hf	4.96	3.59	4.77	11.3	12.4	7.17	19.1	15.4
Th	25.3	9.56	12.1	156	159	49.2	34.8	20
U	5.45	3.08	3.5	14.3	13.9	6.65	3.46	1.66
Pb	31.7	31.5	23	38.3	40.2	37.2	42.4	17.8
V	88.5	188	141	86.6	91.5	168	26.7	35.8
Cr	33.1	150	37.1	47.1	42.6	112	4.08	1.88
Co	11.2	26.6	16.1	12.7	12.1	23.1	3.35	4.21
Ni	8.68	35.5	12.5	13.1	13	24.4	2.63	1.74
Cu	7.45	19.6	34.1	29.3	27.7	33.4	9.78	3.82
(La/Yb)N	12.9033	13.4646	9.20801	21.1539	19.4996	15.4003	52.4869	53.8687
Eu*	1.43291	0.57718	0.909598	0.542941	0.728282	0.979571	0.581552	0.167575
Sr/Y	17.9602	20.8088	27.3222	16.6107	17.5748	13.5889	6.22768	12.6064
Zr/Y	7.8607	5.07353	7.23849	14.8658	16.2458	10.1045	15.8259	38.9362
Nb/Ta	11.4685	20.5882	12.6984	15.4649	15.3899	18.2667	18.1081	19.64
Zr/Hf	31.8548	38.4401	36.2683	39.2035	39.4355	40.4463	37.1204	47.5325

## Sheet: Read me
GSA Data Repository #2019125
Changfeng Liu, Chen Wu, Zhijie Song, Wencan Liu, Hongyuan Zhang, 2019, Petrogenesis and tectonic significance of Early Paleozoic magmatism in the northern margin of the Qilian block, northeastern Tibetan Plateau: Lithosphere, https://doi.org/10.1130/L1047.1
